# Supplementary material for: A Survey of Genomic Studies Supports Association of Circadian Clock Genes with Bipolar Disorder Spectrum Illnesses and Lithium Response
Source: PLoS One. 2012 Feb 22;7(2):e32091. doi: 10.1371/journal.pone.0032091 (PMC3285204; doi:10.1371/journal.pone.0032091)
Supplement: Table S2 — (XLS) [file pone.0032091.s002.xls]

## Sheet: Sheet1
343 Genes from Zhang et al	40 Clock Modulator Aliases	148 PRCCGs	450 WRCCGs (Randomly Selected)	450 Non-Rhythmic Genes (Randomly Selected)
ABCC3	NAE1	Per2	Acvrl1	SERPINA1
ABL1	CMTM7	Nr1d2	Atp10d	GOSR2
ACSF3	UNC45B	Arntl	Tsga14	HLA-B
ACTL6A	ENY2	Nfil3	Npdc1	EDN2
ANKLE1	FAM102A	Dbp	Nup37	NFATC4
ANTXR1	FFAR1	Usp2	Pla2g4b	AIF1
APPBP1	GPR89A	Tef	Gli3	NPR2
ARFIP2	HNRNPR	Nr1d1	Nap1l3	PIGL
ASB5	KRR1	Timp3	Smpd3	CCDC41
ASCC3	CDC73	Cry1	Tmem97	TFAP2B
ATF6	CWC15	Tspan4	Ppp1r13l	GAGE2A
B4GALT2	CFI	Clock	Ltbp1	CDX2
BAI3	CADM4	Bhlhb2	Sema3c	PPP2CB
BCR	TUBA1B	Cdkn1a	Pcbd1	VPREB3
BDP1	MECR	Fkbp5	Slc43a2	SH2D1A
BLNK	NOB1	Rorc	Lxn	CASP4
BMP4	NHP2	Col4a1	Athl1	MAP3K5
BOLA3	PEF1	Tsc22d3	Krt25	PRDM11
BRCA2	C16orf72	H3f3b	Igfbp1	ELOVL4
BSCL2	PWP2	Hspa8	Incenp	PDK2
BTC	RAP1GAP	Pdcd4	Retsat	MT2A
BTN2A2	RCVRN	Gsta3	Cep110	LRCH4
BTNL2	SEC16B	Per1	Opa1	HSP90AB1
BTNL8	RXFP4	Pim3	Dyrk1a	POU2F3
C10orf137	RNPC3	Inmt	Tbc1d22a	SNX3
C1orf109	SEC13	Herpud1	Hcls1	LAIR2
C1ORF131	KCNT2	Cpt1a	Lepre1	GRIA1
C1orf85	STX4	Nedd4l	Polk	CABP1
C20orf160	RCC2	Fbn1	Zscan2	RANBP17
C22orf30	SERINC1	Marcks	Frag1	ACAA1
C6orf89	MED30	Hsp110	Snrpb	CXCR6
C9orf86	TMSB15B	Per3	Ilkap	SLC19A3
CAD	C16orf82	Litaf	Acpp	CAST
CARD11	TCF3	Cirbp	Btrc	SPACA1
CARD9	UBA3	Pbef1	Dnm3	CXorf1
CASC1	BEST1	Hnrpdl	Xcl1	LLGL2
CBLN1	BRWD1	Por	Tmem135	CDK3
CCDC108	YTHDC1	Ccrn4l	Gdi2	HOXD10
CCDC81	ZMYM3	Mid1ip1	Peli2	CASR
CCDC87	ZNF75D	Tfrc	Slc35a3	PHOX2B
CCT5		Hspa1b	Ankrd22	CAPN11
CDC2L1		St13	Exosc6	LILRB1
CDK3		Cldn5	Glrx2	CHRM5
CDK6		Hsp90aa1	Stxbp4	ZP3
CDK9		Dynll1	Rnf146	OR52A1
CEACAM21		Tubb2a	Mrpl38	GOLGA3
CENPM		Col3a1	Arf3	HIST1H3D
CES1		Sash1	Psph	RNMT
CHID1		P4ha1	Dpy19l3	EVC
CIDEC		Cys1	Apobec1	RHOH
CKLF		Ppp1r3c	Rnaseh2b	SMUG1
CKLFSF7		Ephx1	Slfn5	EDN3
CLCN6		Cyb5b	Grin1	CLDN8
CLPX		Tenc1	Supt3h	ZMAT3
CMYA4		Fkbp4	Rfwd3	TSKS
CNNM4		Snrk	Itgb4	SORBS3
CNOT2		Pnrc1	Gnrhr	CDS1
COPE		Ubc	Lamp2	PGD
COPS2		Cyp51	Taf1c	OR1A1
COX4NB		Prkar1a	Ppp2r1a	TMED2
COX7B		Sept4	Clrn1	NMU
Cry2		Nsdhl	Sox2	GPX4
CRYGD		Acsl1	Vdac2	SIGIRR
CSE1L		Pdxk	Slc16a2	OAS1
CSNK1A1		Btf3l4	Cstf3	MYST4
CSNK1E		Pfkp	Hcfc1r1	ZNF143
CSNK2A1		Dnaja1	Akr1d1	DKK2
CTDP1		Hist1h1c	Pak7	AKAP10
CX3CL1		Thra	Raly	GOLGA2
CXorf15		Fus	Il1rl1	ATP5B
DCLRE1A		Dscr1	Sfi1	PNPLA6
DDB1		Id1	Ednra	TRIM16
DDX3X		Phf17	Tmem55a	CROP
DDX56		S3-12	Efemp1	COL8A1
DENND2D		Gpiap1	Rgma	GYPA
DGKQ		Hmgcs1	Prok2	MAGEA12
DHFR		Egr1	Tmem159	NPC1L1
DHX29		Eif1a	Hexim2	KLK5
DMAP1		Mtf2	Ascc2	MCHR1
DOK5		Znrf2	Stat4	UPF3B
DUSP8		Klf9	Spats2	CBX3
e(y)2		Col4a2	Mmab	VPS26A
EEIG1		Hist1h2bc	Map3k10	ZNF254
EMP2		Rhoj	Atxn2	TRIP11
EMR2		Ces3	Ttc18	UCRC
ENG		D7Wsu130e	Scamp2	OXTR
EPAS1		Eln	Krt13	CHEK1
EXOSC4		Glul	Dgkg	HOXC8
FAM55D		Nfe2l2	Dlgap4	SHBG
FBXL3		Ahctf1	Arrb2	ATM
FBXO16		Serpinh1	Zfp41	HIST1H2AG
FBXO45		Hspa5	Mrpl1	PTGFR
FBXW11		Pdia6	Tmem87b	NR2E3
FGF10		Hmgb3	Tectb	DMTF1
FGF19		Anp32a	Gsk3b	SCNN1B
FHIT		Gja1	Usp21	PLS1
FKBP11		Tuba1b	Hspa2	SREBF1
FKSG2		H1f0	Zmat5	DCT
FOXA3		Mmp14	Slc5a1	SH3BGRL3
FOXF1		Sqle	Slc28a3	ABCB8
FOXL1		Elovl5	Itga1	KLF8
FRAP1		Hspb1	Emr1	CCRL2
FUCA1		Tob2	Slc6a20	CA11
FUT5		Sfrs5	Hexb	SPI1
FZD10		Hsp90ab1	Tmem132c	RFPL3
GFAP		Slc25a29	Purb	PHF11
GIPC2		Actb	Mysm1	MSRA
GJB7		Cdk2ap1	H2afy2	RPL11
GLT25D2		Mfsd1	Snurf	MTMR7
GMFG		Map2k3	Tcn2	KYNU
GMNN		Alas1	Tmem19	TMSL8
GPR124		Foxp1	Yod1	TTK
GPR135		Pim1	Tigd2	TPO
GPR137		Pdk4	Fcrl1	SPO11
GPR158		Sin3b	Pebp1	WHSC2
GPR17		Thrap3	Rab3d	TNNI3K
GPR37L1		Ctgf	Hsd17b3	NR3C2
GPR40		Col6a1	Tjp3	GCNT4
GPR45		Amd1	Bxdc5	KCTD3
GPR78		Slc4a4	Edem1	ZNF580
GPR89		Sult1a1	Xab2	PEMT
GRIA2		Sema4a	Anxa6	CCHCR1
GRM5		Gprk5	Fga	PHC1
GRPR		Xbp1	Aldh18a1	DDX24
GUCY2C		Pnp	Atp5l	HSPBP1
HAS3		Rbms1	Slc35b3	MKNK1
HCFC1		Cp	Mapk13	C5AR1
HEATR5B		Foxo3a	Umod	OR7C2
HGFAC		Tbc1d20	Prdm16	NOMO2
HIF1AN		Prei4	Thpo	MS4A3
HIST1H1B		Cebpb	Cln8	SPAG4
HNRPR		Acsl5	Rbm20	IDH3B
HOMER3		Net1	Arg1	ZNF238
HRB2		Errfi1	Tpcn1	CDK6
HRPT2		Tsc22d1	Map2k2	HTR7
HSPC148		Mcl1	Ela3	TNFSF9
ICAM5		Ccnl2	Chkb	TXK
IF		Sfrs6	Snrpe	USP13
IFNK		Psmd11	Tubgcp3	BTC
IGSF4C		Pfkfb3	Ccl28	ARD1A
IKBKB		Atp2a2	Ptprn	TMEM50A
INPP5D		Ei24	Timd2	KRT31
INTS2		Bcl2	Erf	TAZ
INTS4		Dusp1	Mcmdc1	PDC
IRF4		Zfp706	Afap1l1	AMPH
ITGA2B		Sbk1	Scrg1	UGT1A10
JAZF1		Mapre1	Wdfy1	GRM8
JUND			Fpgt	HTN1
KALPHA1			Clk4	HMGA1
KCNG2			Hagh	HS3ST3B1
KCNJ1			Klk4	ORC3L
KCNV1			Mtx1	SLAMF8
KIAA0020			Mrpl33	GTF2A1
KIAA1797			Rfx1	USH1C
KPNA4			Cox11	PTPRA
LBX1			Hrh3	FZD9
LHCGR			Iqsec2	RNASEH2A
LHX1			Tigd5	RNF6
LILRB1			Mustn1	CASP4
LIMK1			Ccdc57	ZNF318
LIPG			Snrpc	CCR4
LOXL3			Ankrd28	ZNF7
LPHN1			Gsta2	MBD3
LSM7			Nr2c2	CHRNA6
LYG1			Srpx2	NUP153
LYPD5			Mkrn2	KIF3A
MAD2L1			Tmem62	OR10H1
MAGEA12			Tmem146	GDF1
MAP3K11			Dnm2	MPO
MAP3K2			Prodh2	SYCP1
MAP7D1			Dpyd	NAT1
MAPK8			Actr3	KPNA6
MAPRE2			Serhl	ZFX
MARCH4			Psmb8	PLSCR1
MCR			Bahd1	SPANXA1
MED10			Gpd2	S100A2
MEPCE			Pde3a	CCL23
METTL11B			Steap3	GLT8D1
MFNG			Tnfaip8	PRKG2
MKL1			Scrn2	PAK4
MMP3			Sfxn4	PSMC4
MOSC2			Itga7	IMPDH1
MPG			Plekhm1	OPRM1
MPN2			Ccdc123	MYBPC2
MPND			Onecut3	TAF11
MRGPRE			Ctrc	MMP9
MRPL18			Apoa1	TFAP4
MSRB2			Pdzrn3	VCX
MT2A			Itih1	MLN
MT3			Ddx19a	RBMS1
MYL5			Gk5	PRDM12
MYOC			Postn	GABPB2
NAGLU			Tlr4	RCE1
NCL			Arhgef18	SCP2
NEIL1			Rab26	CBLC
NFE2			Adcy5	MSC
NMNAT1			Sec13	HK3
NOB1P			Mesp1	PCDH1
NOL6			Slc22a13	CDX4
NOLA2			Dkk1	AKR7A2
NPC1L1			Pnmt	ALOX12
NR0B2			Negr1	MMP28
NUFIP2			Bhmt	SFN
NUP88			Zcchc6	CCL2
NYX			Kctd10	HSD17B6
OPN1LW			Lcor	SCGB2A1
OPN1MW			Ctss	LYPD3
OPN5			Pde1c	PANX1
OR1E1			Add2	MS4A6A
OR2W1			Pga5	PZP
OR51B2			Asb4	NDUFC1
OXNAD1			Coro2a	PROZ
P2RY10			Slc16a7	CDC42BPB
PANK2			Lonrf1	TXN
PAPOLB			Lrrcc1	CSH2
PAQR4			Chrna1	TACR2
PARD6A			Art4	GJB3
PDE1B			Ifi35	IL8RA
PDGFC			Cldn22	AGTR1
PEA15			Myo1a	BMP15
PEF			Fabp9	MSH2
PEG3			Dhx40	CYP3A4
PFKP			Hn1	IL8RB
PHEX			Rab15	DEFB126
PHF23			Acad9	CLSPN
PIAS1			Sstr1	NGFRAP1
PIK3R5			Pepd	HBS1L
PKLR			Ppp1ca	KCNJ15
PKP1			Rnf157	ITGAE
PLEKHJ1			Pitpnb	CCHCR1
PNRC2			Phyhipl	FKBP6
POLR2B			Pink1	POLG2
POLR3F			Ift52	MAGEA5
POP1			Kcnj6	ZNF215
PPM1B			Ikbkb	TRIP10
PPP1R2P9			Epsti1	CST8
PRKCI			Wdr40b	DDX1
PRO0149			Hes7	PIK3C2B
PRPF4			Ngdn	GPS1
PSMD13			Tcf23	SLC26A6
PTGER3			Xpnpep1	RPL39
PTK2			Ccdc105	PRDM4
PTTG2			Hpcal1	MAK
PWP2H			Rps6kb1	IMPG2
RAB20			Ank1	ZNF593
RAB3A			Zcchc11	PLEKHA9
RABGEF1			Ube2o	RGS6
RANBP6			Zfx	ENTPD2
RAP1GA1			Farp1	C4BPB
RBL1			Tuba3a	OR3A2
RBM43			Sycp3	COL9A3
RBX1			Lrrc4c	CSPG4
RCV1			Trim41	ZNF212
RETN			Ccl7	GCS1
RGPR			Aspn	PPEF2
RING1			Lhx9	OR3A3
RLN3R2			Cyp1a1	MLL2
RNF103			Blmh	DPYSL4
RNF34			Oaz2	ZNF638
RNP			Fbxo33	POP7
RPS4X			Tex9	ESR2
RRBP1			Zfhx4	LY6G6E
RRH			F2rl3	TAC3
RRP12			Fxr2	STK39
SART3			Abcg4	FLRT1
SCAMP2			Dsc3	TPST2
SCARA3			Ppia	HRH4
SCHIP1			Mrgpre	B4GALT7
SEC13L1			F2rl1	TSPAN3
SELO			Oplah	CHST12
SERPINA12			Sirt3	LAG3
SERPINC1			Vwa1	IL21R
SF1			Elf4	FCGBP
SFN			Dut	ASCL3
SH3GL2			Col20a1	PABPC3
SKIV2L2			Cbx8	NUSAP1
SLAMF7			Ppfibp1	KTN1
SLC22A8			Tiam2	PLEK2
SLC24A3			Zhx2	CDC40
SLC25A27			Imp4	BPESC1
SLC32A1			Slc45a4	ZNF304
SLC34A3			St6galnac2	C8A
SLC39A12			Epha8	EIF2S2
SLC3A1			Gck	SCGB2A2
SLC7A13			Rad21	LCE2B
SLC8A2			Riok1	HEBP2
SLICK			Myo15b	BTN3A3
SNRPB2			H1foo	NCR1
SOCS4			Ints2	KLRA1
SPAG4L			Bdkrb2	NAALADL1
SPR			Gatad1	CPA1
SPRR1B			Ube2n	CAPZB
SRPRB			N6amt1	LHX6
SSBP1			Matn1	CPS1
STX4A			Pcp4	NXF3
SUCNR1			Lrp12	CYP4F3
SUV420H1			Them2	TPD52
SYCP2			Crip2	BRWD2
tAKR			Gata4	ZMYM5
TBC1D9			Prune	SPG7
TBCB			Entpd8	CDC37
TCTA			Zdhhc8	DDR2
TD-60			Cldn14	PRIM1
TDE2			Suox	FCN1
TH			Ptpn5	CYB5R2
THRAP6			Tbl1x	HAX1
TMEM130			Bdh1	DDX43
TMEM2			Nxph4	ITIH3
TMSNB			Bbs4	SLC2A6
TNK2			Pdik1l	ME1
TNT			Prss2	ENOSF1
TPO			Sephs1	AKR1A1
TREM2			Nova1	INSL6
TRIM59			Pls3	COLEC10
TRPM4			Ccdc130	TNFSF13
TRRAP			Tmem185b	CCNE2
TSHB			Hsd17b2	DPH1
TWIST2			Apom	SLC14A2
UBAP2			Guk1	FGF20
UBE1C			Trio	IL22RA1
UBE2B			Hdac3	DICER1
UBQLN4			Efs	GDI2
UNC119			Dennd1a	HIST1H1A
URG4			Stk35	CXCL10
USP1			Ccna2	MTNR1A
VMD2			Mark4	CPB2
VPS4A			Steap4	GPT
WBP11			Zfp92	FAIM3
WDR86			Ehbp1	MAPRE3
WDR9			Igf2bp3	GTF2E1
WDSOF1			Gemin8	NRL
WNT2			Got2	KLRC1
YT521			Rfx5	HIST1H2BE
ZADH2			Zan	PTPRJ
ZBTB20			Intu	OR10H2
ZMAT3			Jarid1d	EPHA2
ZNF211			Nebl	KLK7
ZNF261			Mrpl16	PVALB
ZNF273			Lamb2	GNL1
ZNF358			Glt8d2	NOX5
ZNF75			Chgb	RALB
ZNF91			Ppig	RASSF3
ZSWIM3			Cbx7	UTS2
			Pax5	HLA-DQA1
			Spry1	MAGEA9
			Dffa	CCL18
			Dbnl	FAM53C
			Ace2	SIRT1
			Ap2b1	GARS
			Slitrk2	ZNF544
			Chaf1b	GP9
			Sele	VSIG4
			Gas6	OR2F1
			St8sia1	FAM117A
			Trhr	PTPRR
			Tram2	LCP2
			Rabl2a	ITIH4
			Crocc	MYH11
			Tbc1d16	TSPYL2
			Tmod1	CST6
			Gsto1	SHMT2
			Raver2	TREM1
			Trit1	CYP2C9
			Hs3st1	ATP12A
			Fmn2	RPS11
			Creld1	SLC27A5
			Ypel2	TNFRSF14
			Pou3f2	PNMA3
			Rara	TMED1
			Glycam1	GTPBP6
			Ppp2r2b	PSG7
			Lenep	PRG1
			Sema5b	EDA
			Rxra	HRASLS
			Mbd3l1	KCNJ1
			Evi5	TNFRSF9
			St8sia5	CYP3A7
			Mc2r	ICA1
			Casp12	ROBO1
			Cars2	PILRB
			Alg11	AMELX
			Taf5	HOXA4
			Kars	TIAF1
			Mmp17	CSTA
			Prom1	RBMY1A1
			Stub1	BCAT2
			Clptm1	MEIS2
			Il4	SYT5
			Emilin1	GAB2
			Sspo	ZNF45
			Rnd2	DAZ1
			Prkar1b	LRRC32
			Pgc	BACE2
			Ferd3l	AMY1A
			Bcr	HIST1H2BI
			Gpr39	MEF2C
			Git1	LY6D
			Qrich1	TIMM22
			Dhx33	GTF2E2
			Dusp26	HOXA3
			Cntfr	ZNF141
			Cpa3	OR11A1
			Lgals4	TREM2
			Zp1	DSPP
			Rpl37	ITGA3
			Golga5	B4GALT3
			Cstf2t	ATP5I
			Chrd	ACADL
			Snrpd3	ACOT9
			Cplx4	ADH5
			Hdgfl1	PTPN18
			Chd9	TPX2
			Ccr10	MPI
			Psmb3	PTPRC
			Atp1b2	GKN1
			Lass2	P2RX1
			Setd3	MORC1
			Srp72	PLAG1
			Rnf183	PRKD1
			Emid1	GK
			Syap1	BDH2
			Hmgb1	FXYD2
			Plau	PI15
			Stim2	CSH1
			Ssx2ip	UBE2S
			Mb	KCNC4
			Fabp2	HRG
			Prelp	CAPZA1
			Sostdc1	CDK10
			Foxp3	TBCE
			Cttnbp2	ACACB
			Stk38l	TIMM23
			Abhd10	MICA
			Galnt4	SRCAP
			Gli2	HOXD12
			Klhl8	PRKY
			Zdhhc7	GNAL
			Calcrl	CACNG5
			Dnajc4	AMMECR1
			Mcrs1	PFN1
			Ift80	SEPW1
			Pacrg	PCBP1
			Unc45b	CYP11A1
			Slc25a41	GNG4
			Sel1l	GYPB
			Ccdc15	GRIK2
			Psmb10	HLA-E
			Slc7a11	SSR1
			Strn4	APOL6
				KCNJ16
				EIF2S3
