# Supplementary material for: A Survey of Genomic Studies Supports Association of Circadian Clock Genes with Bipolar Disorder Spectrum Illnesses and Lithium Response
Source: PLoS One. 2012 Feb 22;7(2):e32091. doi: 10.1371/journal.pone.0032091 (PMC3285204; doi:10.1371/journal.pone.0032091)
Supplement: Table S3 — (XLS) [file pone.0032091.s003.xls]

## Sheet: Sheet1
Li-Responsive Clock Modulators	Li-Responsive PRCCGs
APPBP1	Ahctf1
ARFIP2	Alas1
BAI3	Anp32a
BLNK	Atp2a2
BSCL2	Bcl2
CDC2L1	Ccnl2
CDK9	Ccrn4l
CKLF	Cdk2ap1
COPE	Cdkn1a
COPS2	Cldn5
CRY2	Col3a1
DCLRE1A	Col4a1
DDB1	Cp
DDX3X	Ctgf
DUSP8	Cys1
EMP2	Dbp
EXOSC4	Dscr1
FBXL3	Dusp1
FBXO16	Egr1
FBXW11	Ei24
FHIT	Elovl5
FKBP11	Fkbp5
FUCA1	Foxp1
GPR89	Fus
HIF1AN	Gja1
HNRPR	Glul
HRB2	H1f0
KCNV1	H3f3b
MAPK8	Herpud1
MAPRE2	Hist1h1c
MKL1	Hist1h2bc
MOSC2	Hmgcs1
MSRB2	Hnrpdl
MYOC	Hspa1b
NCL	Hspa5
PARD6A	Hspa8
PEA15	Hspb1
PFKP	Inmt
PIAS1	Klf9
POLR2B	Litaf
PSMD13	Mapre1
PTK2	Marcks
RRBP1	Mcl1
SCHIP1	Mid1ip1
SH3GL2	Mmp14
SLC22A8	Nedd4l
SLC25A27	Net1
SLC32A1	Nfe2l2
SNRPB2	P4ha1
SPR	Pdxk
SRPRB	Pfkfb3
SUV420H1	Pfkp
TCTA	Phf17
TNK2	Pnp
TREM2	Psmd11
TRIM59	Rbms1
UBE1C	Sash1
	Sbk1
	Sfrs5
	Slc25a29
	Slc4a4
	Snrk
	Sqle
	St13
	Sult1a1
	Tbc1d20
	Tef
	Thrap3
	Timp3
	Tob2
	Tsc22d3
